# Supplementary material
Source: MDPI journal article supplement (https://www.mdpi.com/2306-5710/7/3/46)
Supplement: s1 [file s1]

# Adapting Polarized Projective Mapping to Investigate Fruitiness Aroma Perception of White Wines from Oregon

Angelica Iobbi and Elizabeth Tomasino \*

Department of Food Science & Technology, Oregon State University, Corvallis, OR 97333, USA;  
angelica.iobbi@oregonstate.edu

\* Correspondence: elizabeth.tomasino@oregonstate.edu; Tel.: +1-(541)737-4866

**Table S1.** Wine chemical analysis.

| Wines | Residual sugars<br>(g/L) | TA<br>(g/L H <sub>2</sub> T) | pH                       | Ethanol<br>(%v/v)       | Acetic acid<br>(g/L)     | Malic acid<br>(g/L)     | Total SO <sub>2</sub><br>(mg/L) |
|-------|--------------------------|------------------------------|--------------------------|-------------------------|--------------------------|-------------------------|---------------------------------|
| C1    | 0.49±0 <sup>mn</sup>     | 4.84±0.06 <sup>j</sup>       | 3.40±0.01 <sup>bc</sup>  | 14.91±0.01 <sup>k</sup> | 0.62±0.02 <sup>a</sup>   | 0.07±0.01 <sup>o</sup>  | 74.26±1.62 <sup>c</sup>         |
| C2    | 2.42±0.04 <sup>j</sup>   | 5.16±0.02 <sup>hj</sup>      | 3.48±0 <sup>ab</sup>     | 14.79±0.02 <sup>h</sup> | 0.36±0.01 <sup>cd</sup>  | 1.15±0.01 <sup>h</sup>  | 71.89±1.2 <sup>c</sup>          |
| C3    | 7.46±0.01 <sup>b</sup>   | 5.73±0.02 <sup>e</sup>       | 3.1±0 <sup>hij</sup>     | 14.60±0.01 <sup>i</sup> | 0.18±0.01 <sup>hi</sup>  | 1.65±0 <sup>c</sup>     | 36.16±4.89 <sup>hi</sup>        |
| C4    | 1.23±0.21 <sup>kl</sup>  | 5.07±0.06 <sup>i</sup>       | 3.14±0.01 <sup>fgh</sup> | 14.57±0.02 <sup>e</sup> | 0.32±0.01 <sup>de</sup>  | 0.34±0.01 <sup>m</sup>  | 55.47±4.46 <sup>d</sup>         |
| C5    | 3.605±0.03 <sup>fg</sup> | 5.37±0.12 <sup>gh</sup>      | 3.38±0.01 <sup>bc</sup>  | 13.93±0.02 <sup>g</sup> | 0.16±0 <sup>ijk</sup>    | 1.6±0 <sup>d</sup>      | 48±1.85 <sup>de</sup>           |
| C6    | 1.62±0.06 <sup>k</sup>   | 5.73±0.06 <sup>e</sup>       | 3.09±0 <sup>hij</sup>    | 13.92±0.01 <sup>d</sup> | 0.38±0 <sup>c</sup>      | 0.38±0.01 <sup>l</sup>  | 44.53±0 <sup>efg</sup>          |
| C7    | 0.89±0.01 <sup>lm</sup>  | 5.15±0.06 <sup>hi</sup>      | 3.22±0 <sup>ef</sup>     | 13.86±0.01 <sup>e</sup> | 0.32±0.01 <sup>e</sup>   | 0.23±0 <sup>n</sup>     | 37.87±2.81 <sup>ghi</sup>       |
| P1    | 3.28±0.11 <sup>ghi</sup> | 7.23±0.12 <sup>a</sup>       | 2.84±0.08 <sup>k</sup>   | 13.83±0.01 <sup>f</sup> | 0.32±0.01 <sup>e</sup>   | 2.29±0.01 <sup>a</sup>  | 109.33±0.92 <sup>b</sup>        |
| P2    | 3.14±0.11 <sup>hi</sup>  | 5.83±0.06 <sup>de</sup>      | 3.12±0 <sup>fghi</sup>   | 13.67±0.02 <sup>d</sup> | 0.27±0.02 <sup>f</sup>   | 1.53±0.01 <sup>e</sup>  | 45.33±2.44 <sup>efg</sup>       |
| P3    | 4.03±0.03 <sup>f</sup>   | 5.63±0.06 <sup>ef</sup>      | 3.03±0 <sup>ij</sup>     | 13.66±0.03 <sup>l</sup> | 0.18±0 <sup>hi</sup>     | 1.56±0 <sup>de</sup>    | 31.47±3.78 <sup>ij</sup>        |
| P4    | 3.45±0.04 <sup>gh</sup>  | 5.7±0 <sup>ef</sup>          | 3.11±0 <sup>ghi</sup>    | 13.64±0.01 <sup>g</sup> | 0.18±0 <sup>hi</sup>     | 0.01 <sup>j</sup>       | 23.73±3.23 <sup>k</sup>         |
| P5    | 2.92±0.1 <sup>i</sup>    | 5.27±0.06 <sup>hi</sup>      | 3.09±0 <sup>hij</sup>    | 13.52±0.02 <sup>f</sup> | 0.21±0 <sup>gh</sup>     | 0.96±0 <sup>j</sup>     | 45.6±0.8 <sup>ef</sup>          |
| P6    | 9.52±0.33 <sup>a</sup>   | 6.03±0.06 <sup>cd</sup>      | 3.01±0.01 <sup>i</sup>   | 13.5±0.02 <sup>j</sup>  | 0.11±0 <sup>l</sup>      | 1.44±0.01 <sup>f</sup>  | 26.67±1.85 <sup>jk</sup>        |
| P7    | 6.49±0.11 <sup>c</sup>   | 7±0 <sup>b</sup>             | 2.89±0.12 <sup>k</sup>   | 13.36±0.01 <sup>l</sup> | 0.13±0 <sup>kl</sup>     | 1.8±0.01 <sup>b</sup>   | 35.2±3.2 <sup>hi</sup>          |
| V1    | 2.89±0.02 <sup>i</sup>   | 4.43±0.12 <sup>k</sup>       | 3.25±0.01 <sup>de</sup>  | 13.33±0.02 <sup>h</sup> | 0.12±0 <sup>l</sup>      | 1.05±0.01 <sup>i</sup>  | 23.73±2.01 <sup>k</sup>         |
| V2    | 4.48±0.05 <sup>e</sup>   | 5.73±0.15 <sup>e</sup>       | 3.48±0 <sup>ab</sup>     | 13.27±0.02 <sup>f</sup> | 0.13±0.01 <sup>kl</sup>  | 0.55±0 <sup>k</sup>     | 40.27±0.46 <sup>fgh</sup>       |
| V3    | 0.77±0.02 <sup>m</sup>   | 4.07±0.06 <sup>l</sup>       | 3.4±0 <sup>bc</sup>      | 13.26±0.02 <sup>i</sup> | 0.14±0.01 <sup>jkl</sup> | 1.14±0 <sup>h</sup>     | 51.73±2.44 <sup>de</sup>        |
| V4    | 5.01±0.06 <sup>d</sup>   | 6.1±0 <sup>c</sup>           | 3.21±0.01 <sup>efg</sup> | 13.17±0.02 <sup>c</sup> | 0.17±0 <sup>ij</sup>     | 0.04±0.01 <sup>op</sup> | 51.73±2.44 <sup>de</sup>        |
| V5    | 0.31±0.01 <sup>n</sup>   | 5.5±0 <sup>fg</sup>          | 3.26±0.01 <sup>de</sup>  | 12.94±0.05 <sup>b</sup> | 0.37±0.02 <sup>c</sup>   | 0.01±0.01 <sup>p</sup>  | 21.6±1.6 <sup>k</sup>           |
| V6    | 6.41±0.11 <sup>c</sup>   | 4.47±0.12 <sup>k</sup>       | 3.52±0.02 <sup>a</sup>   | 12.86±0.02 <sup>a</sup> | 0.22±0 <sup>g</sup>      | 1.37±0.01 <sup>g</sup>  | 150.57±0.13 <sup>a</sup>        |
| V7    | 4.54±0.11 <sup>e</sup>   | 5.20±0 <sup>hi</sup>         | 3.33±0 <sup>cd</sup>     | 12.81±0.01 <sup>c</sup> | 0.51±0 <sup>b</sup>      | 1.05±0.02 <sup>i</sup>  | 113.07±1.85 <sup>b</sup>        |

Statistically significant differences ( $P < 0.05$ ) between treatments using Tukey's HSD are indicated by different letters.

**Table S2.** Frequency table of the aroma descriptors elicited by the wine experts panel in the UFP procedure.

| Wines | Tropical fruit | Stone fruit | Citrus | Pome | Floral | Confectionary | Vegetal | Oaky | Volatile | Spoilage |
|-------|----------------|-------------|--------|------|--------|---------------|---------|------|----------|----------|
| C1    | 2              | 1           | 1      | 1    | 1      | 4             | 0       | 2    | 3        | 1        |
| C2    | 3              | 2           | 3      | 3    | 0      | 3             | 2       | 2    | 2        | 1        |
| C3    | 3              | 5           | 4      | 2    | 1      | 0             | 1       | 1    | 0        | 2        |
| C4    | 1              | 3           | 4      | 1    | 3      | 2             | 3       | 2    | 1        | 2        |
| C5    | 5              | 2           | 5      | 2    | 1      | 1             | 1       | 0    | 0        | 1        |
| C6    | 0              | 4           | 4      | 1    | 1      | 2             | 2       | 6    | 0        | 0        |
| C7    | 2              | 3           | 4      | 4    | 2      | 1             | 1       | 2    | 0        | 1        |
| P1    | 2              | 2           | 7      | 3    | 1      | 2             | 3       | 0    | 3        | 1        |
| P2    | 4              | 0           | 4      | 2    | 1      | 2             | 2       | 2    | 0        | 1        |
| P3    | 4              | 4           | 5      | 1    | 1      | 0             | 3       | 0    | 2        | 2        |
| P4    | 5              | 4           | 6      | 2    | 2      | 1             | 2       | 1    | 1        | 0        |
| P5    | 4              | 4           | 3      | 5    | 4      | 2             | 1       | 0    | 1        | 1        |
| P6    | 2              | 2           | 3      | 1    | 3      | 1             | 5       | 0    | 0        | 3        |
| P7    | 1              | 0           | 5      | 3    | 5      | 0             | 3       | 0    | 1        | 2        |
| V1    | 3              | 2           | 6      | 3    | 1      | 0             | 1       | 0    | 1        | 0        |
| V2    | 5              | 5           | 4      | 2    | 4      | 1             | 2       | 0    | 0        | 0        |
| V3    | 6              | 2           | 5      | 4    | 2      | 2             | 1       | 0    | 1        | 0        |
| V4    | 5              | 2           | 6      | 2    | 1      | 1             | 2       | 2    | 0        | 2        |
| V5    | 3              | 0           | 1      | 1    | 0      | 3             | 4       | 1    | 3        | 4        |
| V6    | 7              | 4           | 4      | 3    | 1      | 1             | 2       | 0    | 0        | 2        |
| V7    | 1              | 2           | 7      | 1    | 1      | 1             | 2       | 2    | 3        | 2        |

**Table S3.** Frequency table of the aroma descriptors elicited by the trained consumers panel in the UFP procedure.

| Wines | Tropical fruit | Stone fruit | Citrus | Pome | Melon | Berry | Floral | Confectionary | Vegetal | Oaky | Volatile | Faint |
|-------|----------------|-------------|--------|------|-------|-------|--------|---------------|---------|------|----------|-------|
| C1    | 2              | 2           | 6      | 4    | 0     | 5     | 0      | 3             | 1       | 4    | 1        | 0     |
| C2    | 2              | 1           | 2      | 3    | 0     | 4     | 1      | 4             | 1       | 2    | 5        | 1     |
| C3    | 3              | 1           | 6      | 4    | 1     | 0     | 2      | 0             | 0       | 2    | 1        | 1     |
| C4    | 0              | 3           | 3      | 3    | 1     | 3     | 1      | 1             | 2       | 4    | 4        | 0     |
| C5    | 4              | 1           | 6      | 3    | 0     | 0     | 1      | 0             | 2       | 4    | 1        | 1     |
| C6    | 0              | 0           | 2      | 2    | 2     | 4     | 0      | 5             | 1       | 4    | 0        | 2     |
| C7    | 1              | 2           | 2      | 3    | 1     | 1     | 0      | 3             | 1       | 5    | 1        | 1     |
| P1    | 1              | 2           | 6      | 4    | 1     | 5     | 4      | 2             | 1       | 2    | 2        | 2     |
| P2    | 4              | 3           | 4      | 1    | 0     | 2     | 2      | 3             | 1       | 0    | 0        | 2     |
| P3    | 1              | 4           | 8      | 2    | 2     | 0     | 1      | 2             | 1       | 2    | 3        | 0     |
| P4    | 3              | 3           | 4      | 4    | 1     | 4     | 1      | 2             | 1       | 2    | 1        | 3     |
| P5    | 5              | 2           | 4      | 2    | 2     | 1     | 2      | 3             | 1       | 0    | 2        | 0     |
| P6    | 3              | 2           | 3      | 2    | 0     | 3     | 4      | 4             | 1       | 1    | 1        | 0     |
| P7    | 2              | 3           | 4      | 4    | 1     | 1     | 4      | 0             | 2       | 2    | 1        | 0     |
| V1    | 3              | 1           | 9      | 1    | 2     | 2     | 1      | 1             | 1       | 2    | 2        | 5     |
| V2    | 4              | 4           | 4      | 2    | 0     | 0     | 3      | 2             | 3       | 1    | 0        | 0     |
| V3    | 6              | 5           | 4      | 1    | 2     | 5     | 2      | 2             | 1       | 0    | 0        | 1     |
| V4    | 2              | 6           | 2      | 2    | 2     | 3     | 1      | 3             | 0       | 0    | 0        | 0     |
| V5    | 0              | 0           | 3      | 1    | 0     | 2     | 1      | 1             | 0       | 2    | 5        | 0     |
| V6    | 3              | 4           | 6      | 1    | 2     | 3     | 2      | 2             | 4       | 1    | 2        | 2     |
| V7    | 3              | 2           | 1      | 0    | 2     | 1     | 0      | 0             | 3       | 4    | 4        | 1     |

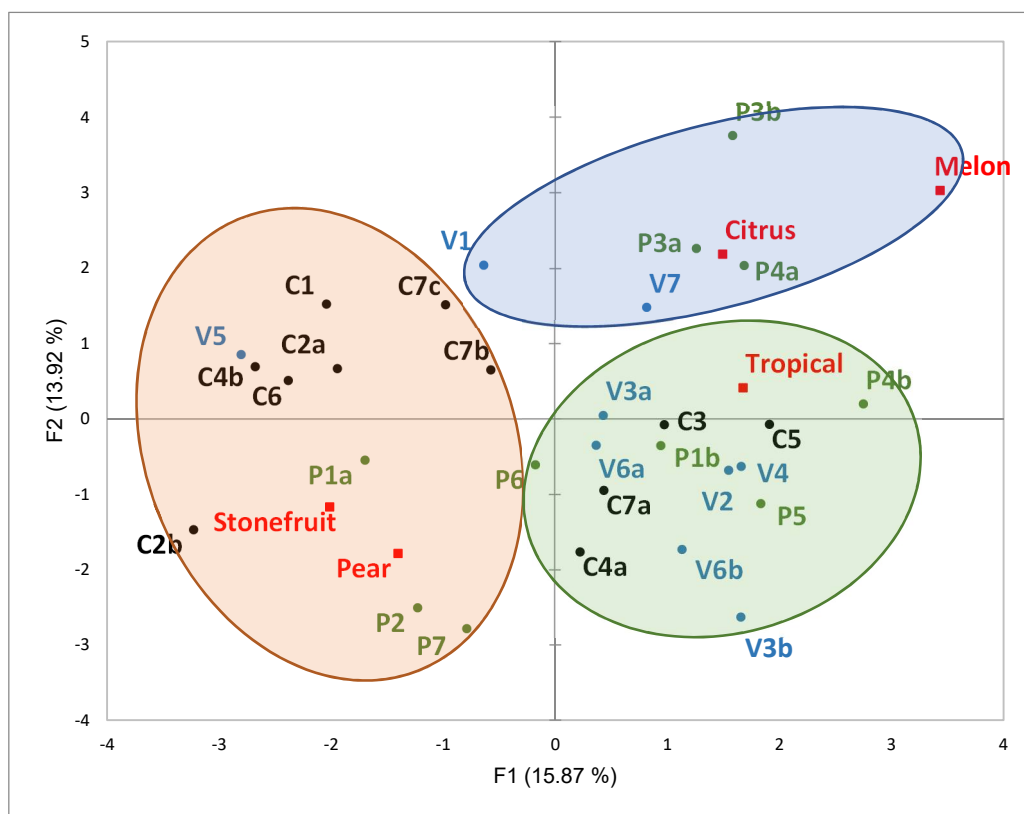

**Figure S1.** MFA plot showing wine experts PPM results of the separated replicate wines for the first and second factors. Ellipses identified groups according to k-means clustering. Varietal wines are shown in different colors.

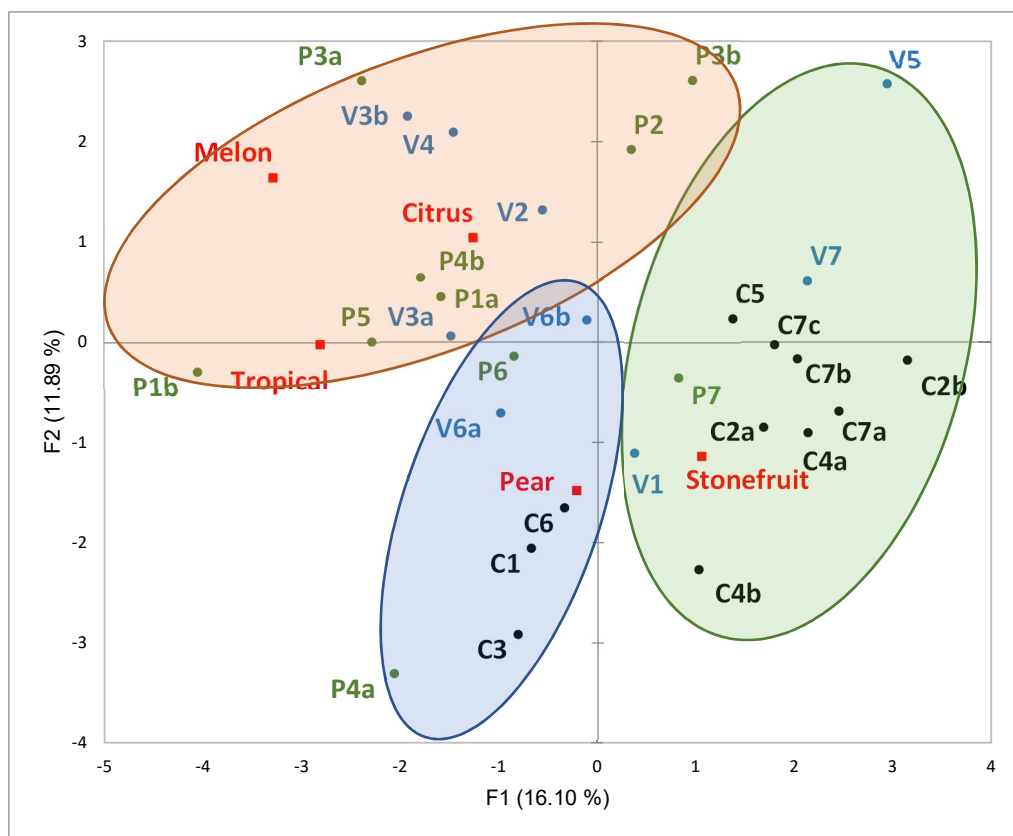

**Figure S2.** MFA plot showing trained consumers PPM results of the separated replicate wines for the first and second factors. Ellipses identified groups according to k-means clustering. Varietal wines are shown in different colors.
